# Supplementary material for: MEK Inhibitors Reverse cAMP-Mediated Anxiety in Zebrafish
Source: PubMed Central journal article supplement (PMC4623357; doi:10.1016/j.chembiol.2015.08.010), 2015-10-22
Supplement: mmc1.pdf [file mmc1.pdf]

**Chemistry & Biology, Volume 22**

**Supplemental Information**

**MEK Inhibitors Reverse cAMP-Mediated**

**Anxiety in Zebrafish**

**Pia R. Lundegaard, Corina Anastasaki, Nicola J. Grant, Rowland R. Sillito, Judith Zich, Zhiqiang Zeng, Karthika Paranthaman, Anders Peter Larsen, J. Douglas Armstrong, David J. Porteous, and E. Elizabeth Patton**

## Supplementary Movies

**Movie 1, Related to Figure 1. Open-arena positioning of control treated embryos before and after disruption.** The position of DMSO treated zebrafish embryos in a 10-cm Petri dish is disrupted by swirling the water, and recorded for approximately 30 seconds.

**Movie 2, Related to Figure 1. Open-arena positioning of rolipram treated embryos before and after disruption.** The position of 15 $\mu$ M rolipram treated zebrafish embryos in a 10-cm Petri dish is disrupted by swirling the water, and recorded for approximately 30 seconds.

## Supplementary Figures

**Figure S1, Related to Figure 1 | Rolipram treatment causes thigmotaxis in zebrafish larvae, before and after disruption.**

(A) Thigmotaxis in an open arena is rapidly re-established after disruption. Still images of the video recorded with DMSO and rolipram treated embryos. Zebrafish embryos were treated with 15 $\mu$ M rolipram for one hour, the dish swirled to disrupt the embryo positions, and then followed for 30 seconds by video (See also **Movies 1, 2**). Larvae exhibiting thigmotaxis are highlighted with orange dots; non-thigmotactic with blue dots.

**Figure S2, Related to Figure 5 | MEKi alone are not anxiolytic in the novel tank test.**

Analysis of single adult zebrafish movements and tank area distribution in the novel tank assay. Fish were pre-treated in 200 ml of drug for 20 minutes, transferred to a 3-liter novel tank and recorded for 5 min (Egan et al., 2009). Drug treatment conditions: MEKi: 2 $\mu$ M; buspirone: 10  $\mu$ M, rolipram: 15 $\mu$ M. \*\* $p < 0.01$ ; n.s. not significant; unpaired two-tailed t-test. Experimental repetitions  $n=2$  with 5 adult fish/per treatment condition. Error bars denote SEM.

**Figure S3, Related to Figure 5 | Behavior analysis of *pde4d* mutant zebrafish**

(A) Schematic comparison between zebrafish Pde4d compared to PDE4D in humans, mice and *Drosophila*. The asterisks denote the point mutation in the *pde4d*<sup>-/-</sup> fish from the Sanger Institute, UK.

(B-D) Image and quantification of tracking from the top of the tank. Distance between individual fish in shoal (shoal cohesion) and total distance moved were measured for 5 minutes following 20 minutes of drug treatment. Mutant *pde4d*<sup>-/-</sup> fish were compared to *pde4d*<sup>+/+</sup> wild type siblings. Unpaired two-tailed T-test.

(E) Group behaviour test with adult *pde4d*<sup>-/-</sup> and sibling *pde4d*<sup>+/+</sup> fish, treated with DMSO or rolipram (15 $\mu$ M). Mutant *pde4d*<sup>-/-</sup> fish show increased explorative behaviour compared with their wild type siblings that is decreased upon rolipram treatment. Two way ANOVA with Bonferroni post-test, \*\*\*  $p < 0.001$ . (Groups of 4 fish, experimental repetitions  $n=3$ ).

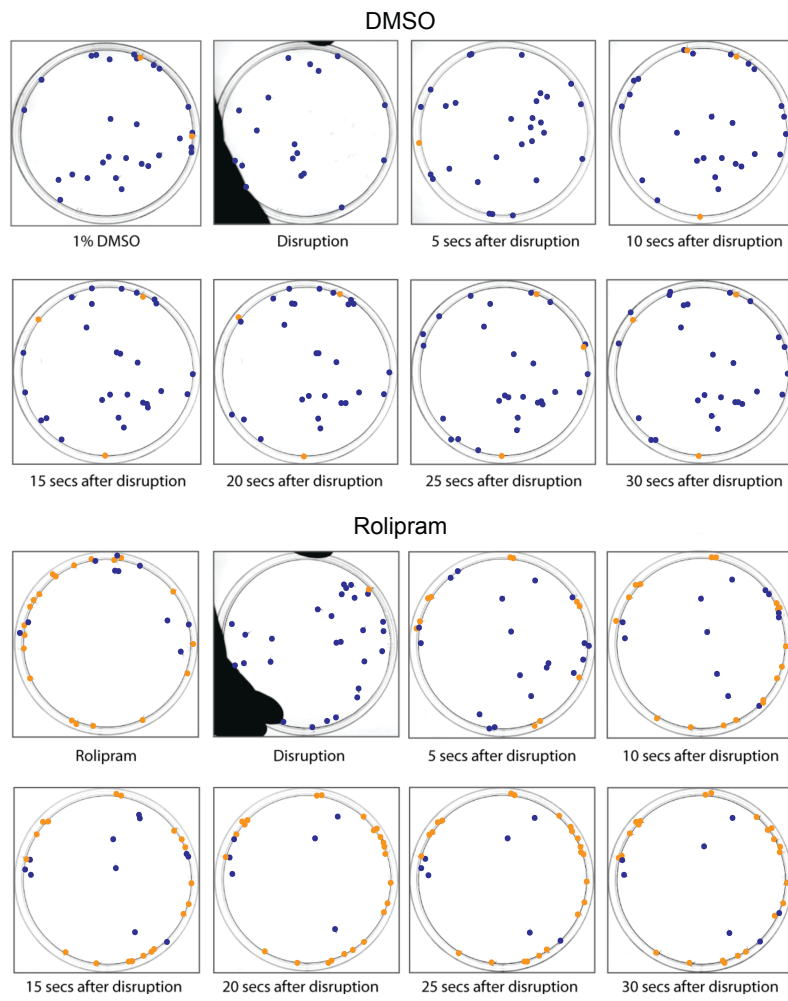

**Figure S1 | Rolipram treatment causes thigmotaxis in zebrafish larvae, before and after disruption.**

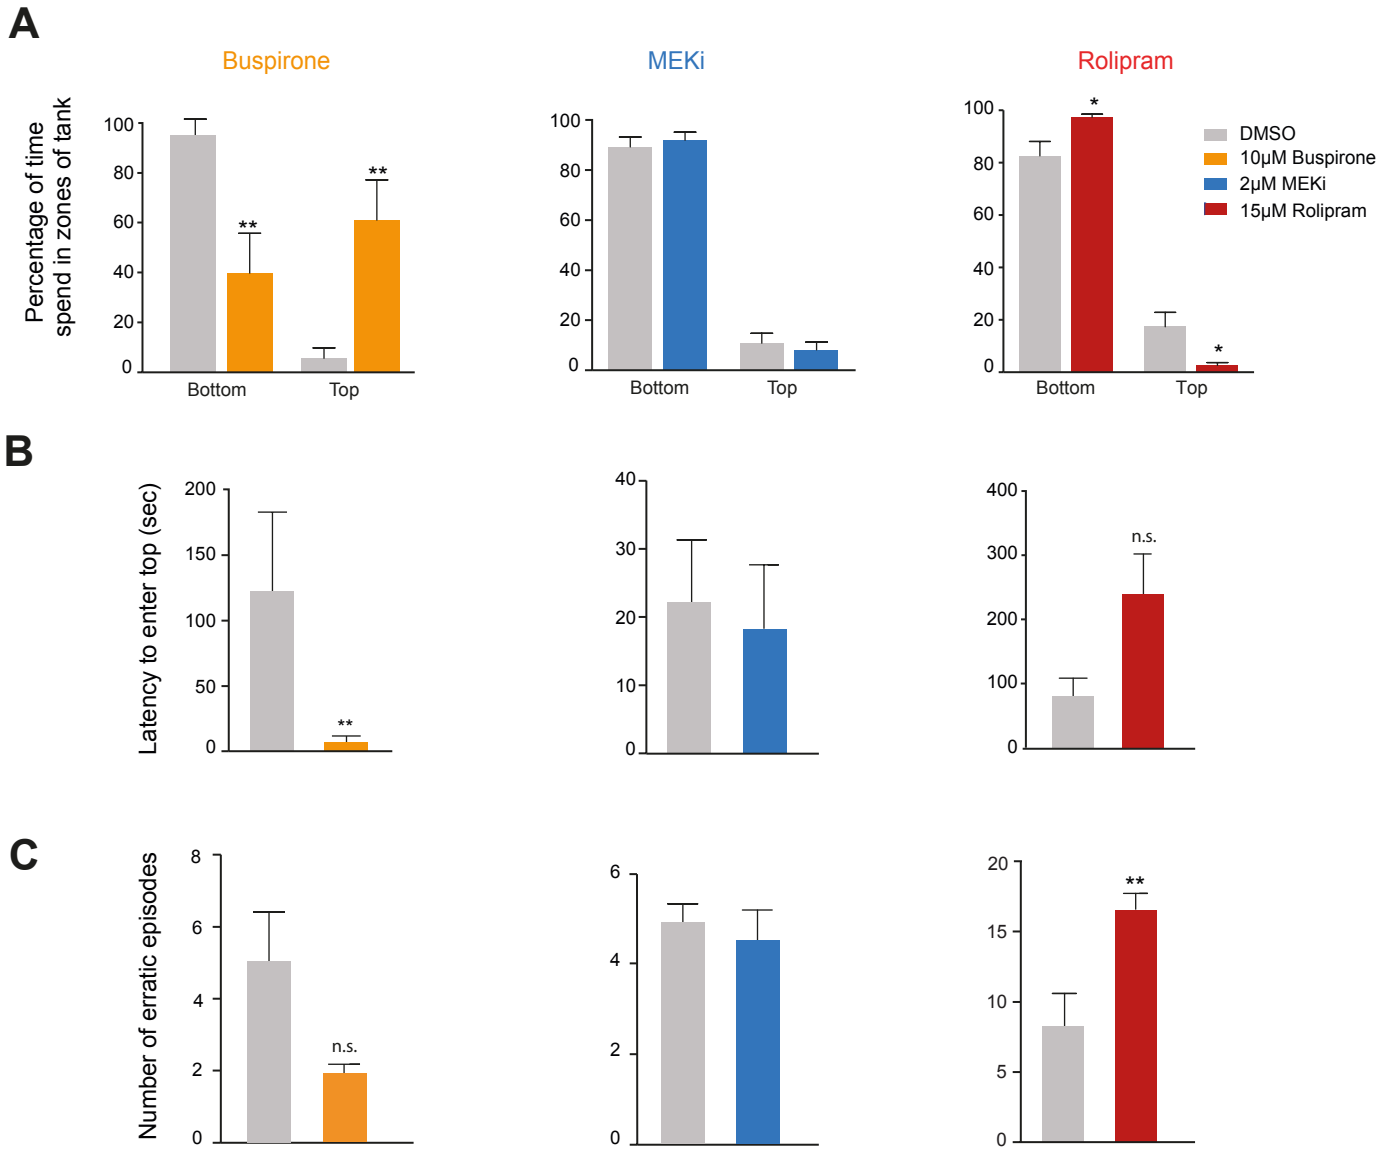

Figure S2 | Novel tank assay analysis for drug treatments

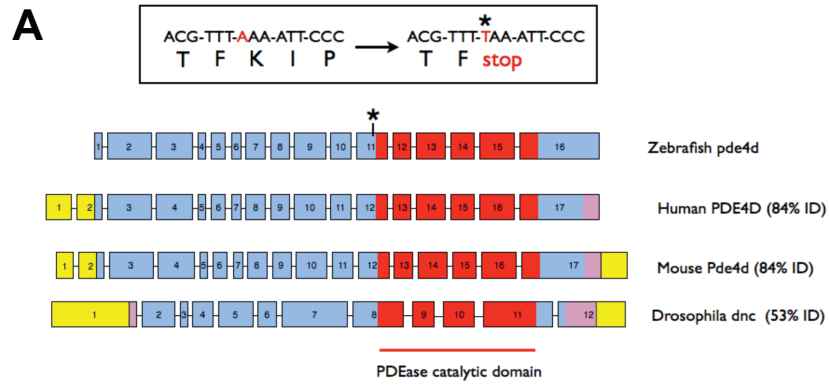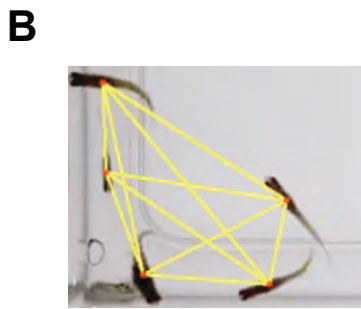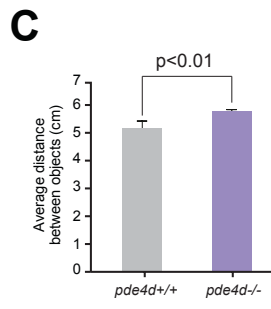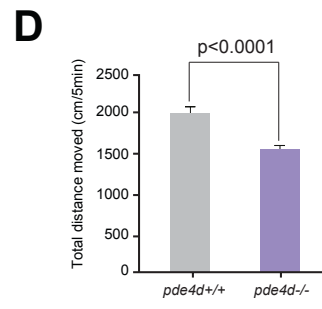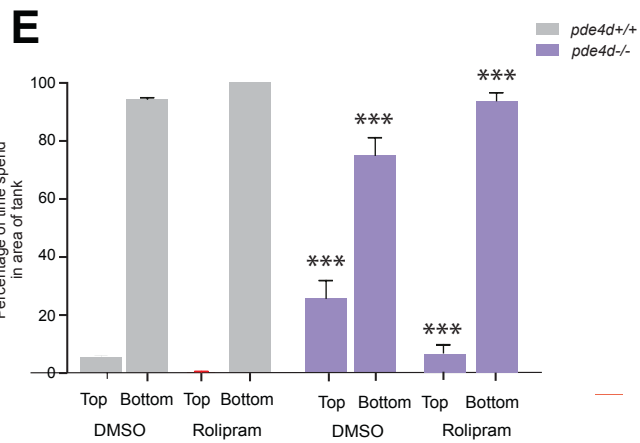

**Figure S3 | Behaviour analysis of *pde4d* mutant zebrafish**
